# Supplementary material
Source: PubMed Central journal article supplement (PMC5886719)

# Supplemental Figure 1

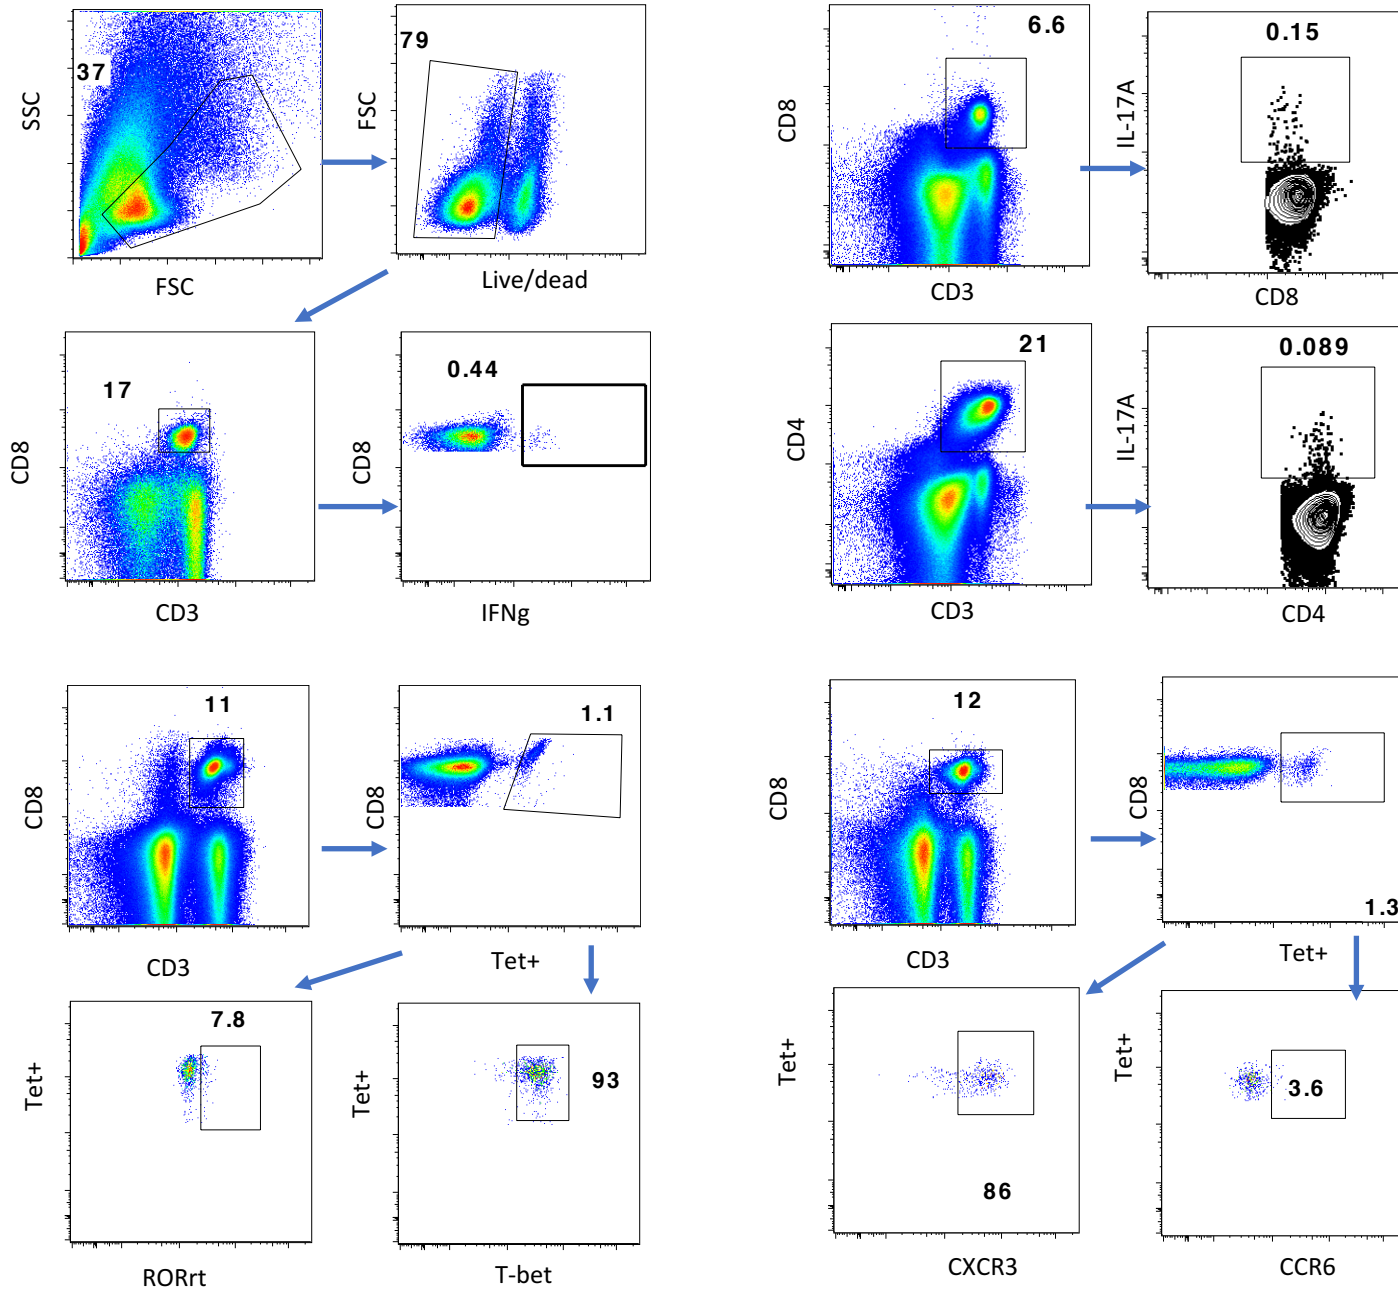

Supplemental Figure 2

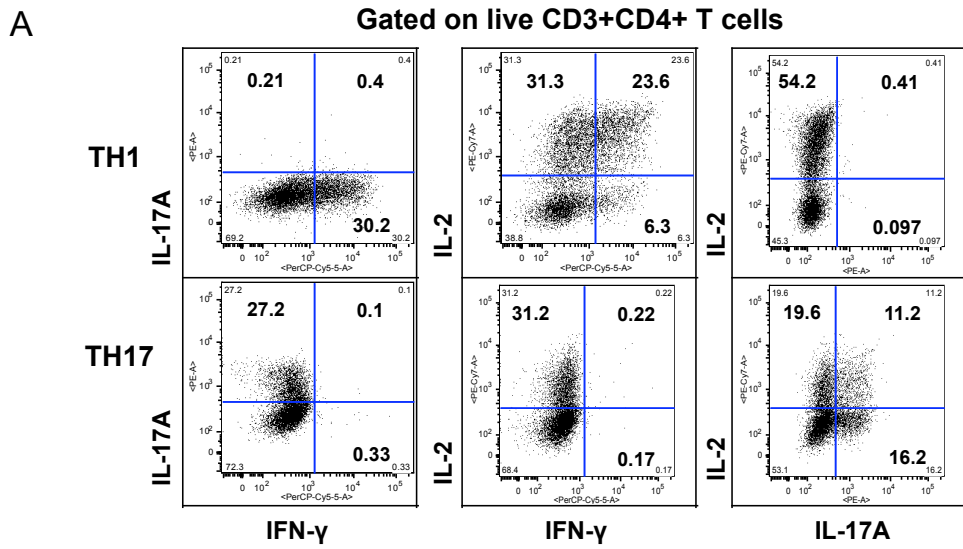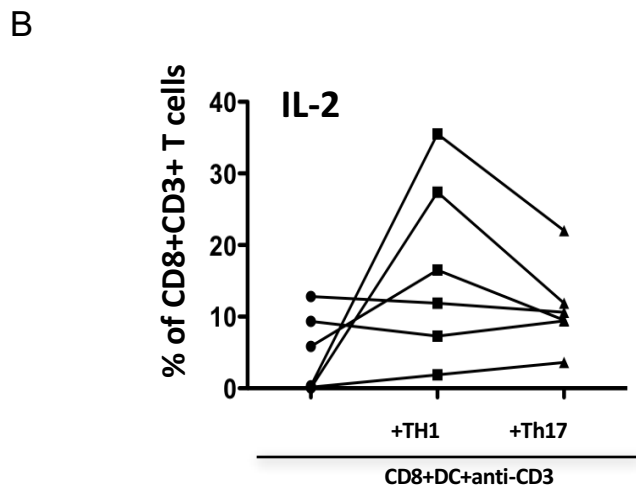

Supplement: NIHMS954117-supplement-Supplementary_Figures.pdf [file NIHMS954117-supplement-Supplementary_Figures.pdf]
